# Supplementary material for: Is Visual Pedagogy Effective in Improving Cooperation towards Oral Hygiene and Dental Care in Children with Autism Spectrum Disorder? A Systematic Review and Meta-Analysis
Source: Int J Environ Res Public Health. 2021 Jan 18;18(2):789. doi: 10.3390/ijerph18020789 (PMC7832292; doi:10.3390/ijerph18020789)
Supplement: Supplementary file 1 [file ijerph-18-00789-s001.xlsx]

## Sheet: Extraction form
Exported Items
Key	Publication Year	Author	Title	Item Type	Publication Title	Type of study	Study design	Visual support	Outcome	Number of subjects	Age range	Sex	Location	Follow up	Home/dental clinica	Database	Risk of bias assessemt
